# Supplementary material for: Anisotropic electrene T′-Ca2P with electron gas magnetic coupling as anode material for Na/K ion batteries
Source: Royal Society of Chemistry journal article supplement (doi:10.1039/d1cp05365e), 2022-01-01
Supplement: d1cp05365e1.pdf [file d1cp05365e1.pdf]

## Electronic Supplementary Information

### **Anisotropic Electrene T'-Ca<sub>2</sub>P with Electron Gas Magnetic Coupling as Anode Material for Na/K Ion Batteries**

Jiaxin Jiang,<sup>a,†</sup> Kai Wang,<sup>a,†</sup> Hongyan Guo,<sup>a</sup> Guizhong Zuo,<sup>b</sup> Zhiwen Zhuo,<sup>\*a</sup> and Ning Lu<sup>\*a</sup>

<sup>a</sup>Anhui Province Key Laboratory of Optoelectric Materials Science and Technology, Key Laboratory of Functional Molecular Solids Ministry of Education, and Department of Physics, Anhui Normal University, Wuhu, Anhui 241000, China

<sup>b</sup>Institute of plasma physics, HIPS, Chinese academy of Sciences, Hefei, 230031, China

\*Corresponding authors: Zhiwen Zhuo, E-mail: [zhuozw@ahnu.edu.cn](mailto:zhuozw@ahnu.edu.cn), Anhui Normal University, Wuhu, Anhui 241000, China

Ning Lu, E-mail: [luning@ahnu.edu.cn](mailto:luning@ahnu.edu.cn), Anhui Normal University, Wuhu, Anhui 241000, China

## I. Structure information of T-Ca<sub>2</sub>P and T'-Ca<sub>2</sub>P

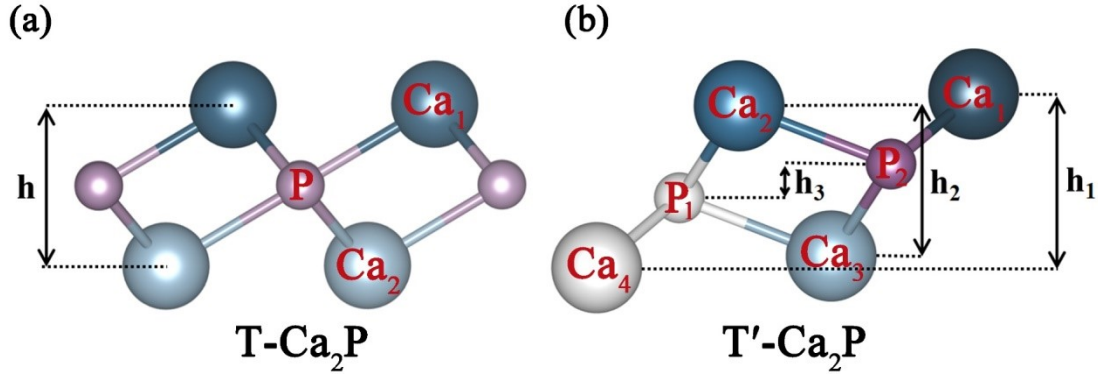

Fig. S1 Side view of T-Ca<sub>2</sub>P (a) and T'-Ca<sub>2</sub>P (b) structure.

Table S1 Structural information of T-Ca<sub>2</sub>P, FM, AFM-0D, AFM-1D<sub>1</sub> and AFM-1D<sub>2</sub> T'-Ca<sub>2</sub>P.

| Phase                                       | Space Group | Lattice Constants (Å)                                                     | Bond Length (Å)                                                   | Bond Angle (°)                                                                                           |
|---------------------------------------------|-------------|---------------------------------------------------------------------------|-------------------------------------------------------------------|----------------------------------------------------------------------------------------------------------|
| T-Ca <sub>2</sub> P                         | P-3m1       | $a = 4.23$<br>$h = 2.90$                                                  | $d_{Ca-P} = 2.83$                                                 | $Ca-P-Ca = 83.92$<br>$P-Ca-P = 96.08$                                                                    |
| FM<br>T'-Ca <sub>2</sub> P                  | P21/m       | $a = 7.38$<br>$b = 4.23$<br>$h_1 = 3.00$<br>$h_2 = 2.60$<br>$h_3 = 0.58$  | $d_{Ca1-P1} = 2.84$<br>$d_{Ca2-P1} = 2.82$<br>$d_{Ca3-P1} = 2.85$ | $Ca_1-P_2-Ca_2 = 108.68$<br>$Ca_2-P_1-Ca_3 = 81.88$<br>$Ca_1-P_2-Ca_3 = 81.95$<br>$P_1-Ca_2-P_2 = 98.12$ |
| AFM-0D<br>T'-Ca <sub>2</sub> P              | P21/m       | $a = 7.35$<br>$b = 8.41$<br>$h_1 = 3.07$<br>$h_2 = 2.66$<br>$h_3 = 0.58$  | $d_{Ca1-P1} = 2.89$<br>$d_{Ca2-P1} = 2.86$<br>$d_{Ca3-P1} = 2.83$ | $Ca_1-P_2-Ca_2 = 107.62$<br>$Ca_2-P_1-Ca_3 = 82.01$<br>$Ca_1-P_2-Ca_3 = 83.61$<br>$P_1-Ca_2-P_2 = 97.99$ |
| AFM-1D <sub>1</sub><br>T'-Ca <sub>2</sub> P | P21/m       | $a = 7.38$<br>$b = 4.26$<br>$h_1 = 2.99$<br>$h_2 = 2.57$<br>$h_3 = 0.62$  | $d_{Ca1-P1} = 2.89$<br>$d_{Ca2-P1} = 2.85$<br>$d_{Ca3-P1} = 2.83$ | $Ca_1-P_2-Ca_2 = 109.56$<br>$Ca_2-P_1-Ca_3 = 81.71$<br>$Ca_1-P_2-Ca_3 = 81.82$<br>$P_1-Ca_2-P_2 = 98.29$ |
| AFM-1D <sub>2</sub><br>T'-Ca <sub>2</sub> P | P21/m       | $a = 14.75$<br>$b = 4.23$<br>$h_1 = 3.04$<br>$h_2 = 2.62$<br>$h_3 = 0.58$ | $d_{Ca1-P1} = 2.89$<br>$d_{Ca2-P1} = 2.85$<br>$d_{Ca3-P1} = 2.83$ | $Ca_1-P_2-Ca_2 = 108.35$<br>$Ca_2-P_1-Ca_3 = 82.01$<br>$Ca_1-P_2-Ca_3 = 82.85$<br>$P_1-Ca_2-P_2 = 97.99$ |

## II. The details of magnetic coupling

Three different magnetic coupling in the T'-Ca<sub>2</sub>P are considered here: (I) inner-channel coupling; (II) inter-channel coupling on same surface and (III) inter-channel coupling on different surfaces. Three different AFM configurations have been investigated, as shown in Fig. S2†. Among the exchange interactions, the coupling I is direct exchange interaction, coupling II and III are indirect exchange interaction. Our results indicate that the coupling I is strong while coupling II and III are quite weak. There is relatively strong  $d(\text{Ca})-d(\text{Ca})$  coupling within AFM interaction for coupling I, due to the too close distance between magnetic LAE. For the coupling II, there is much weaker  $d(\text{Ca})-d(\text{Ca})$  coupling within FM interaction based on the energy difference between FM and AFM-1D<sub>2</sub>, when the distance between magnetic LAE is significantly large. For the coupling III, there is weakest  $d(\text{Ca})-p(\text{P})-d(\text{Ca})$  indirect coupling between the magnetic LAE, that the energy difference between FM and AFM-1D<sub>1</sub> is quite close.

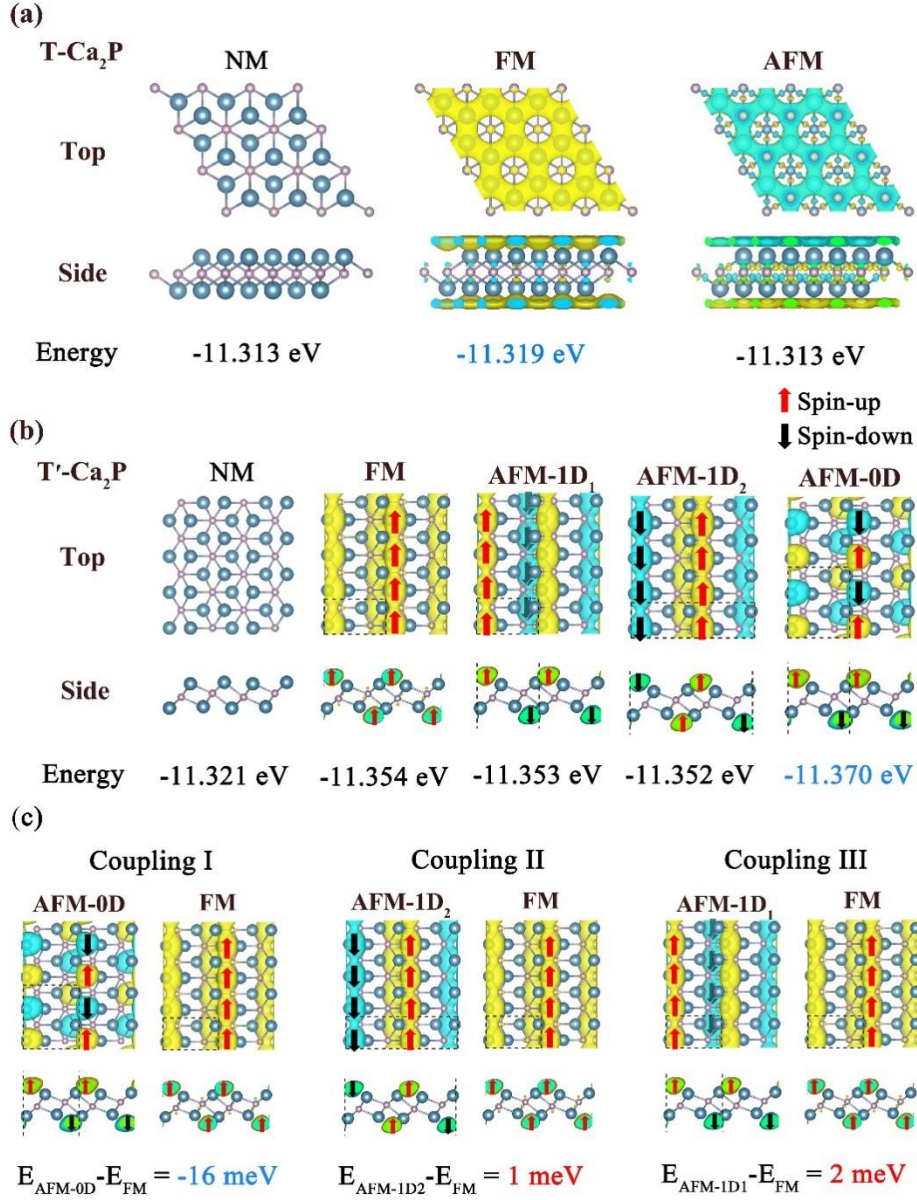

**Fig. S2** The spin charge density and energy of unit formula cell ( $\text{Ca}_2\text{P}$ ) of T- $\text{Ca}_2\text{P}$  (a) and T'- $\text{Ca}_2\text{P}$  (b) at different magnetic states, including: NM, FM and AFM T- $\text{Ca}_2\text{P}$ ; NM, FM, AFM-1D<sub>1</sub>, AFM-1D<sub>2</sub> and AFM-0D T'- $\text{Ca}_2\text{P}$ . (c) Schematic diagram of three different magnetic coupling and the energy difference between corresponding magnetic states and FM. Isovalue of 0.002 e/Bohr<sup>3</sup>.

### III. The structure stabilities of T'-Ca<sub>2</sub>P monolayer

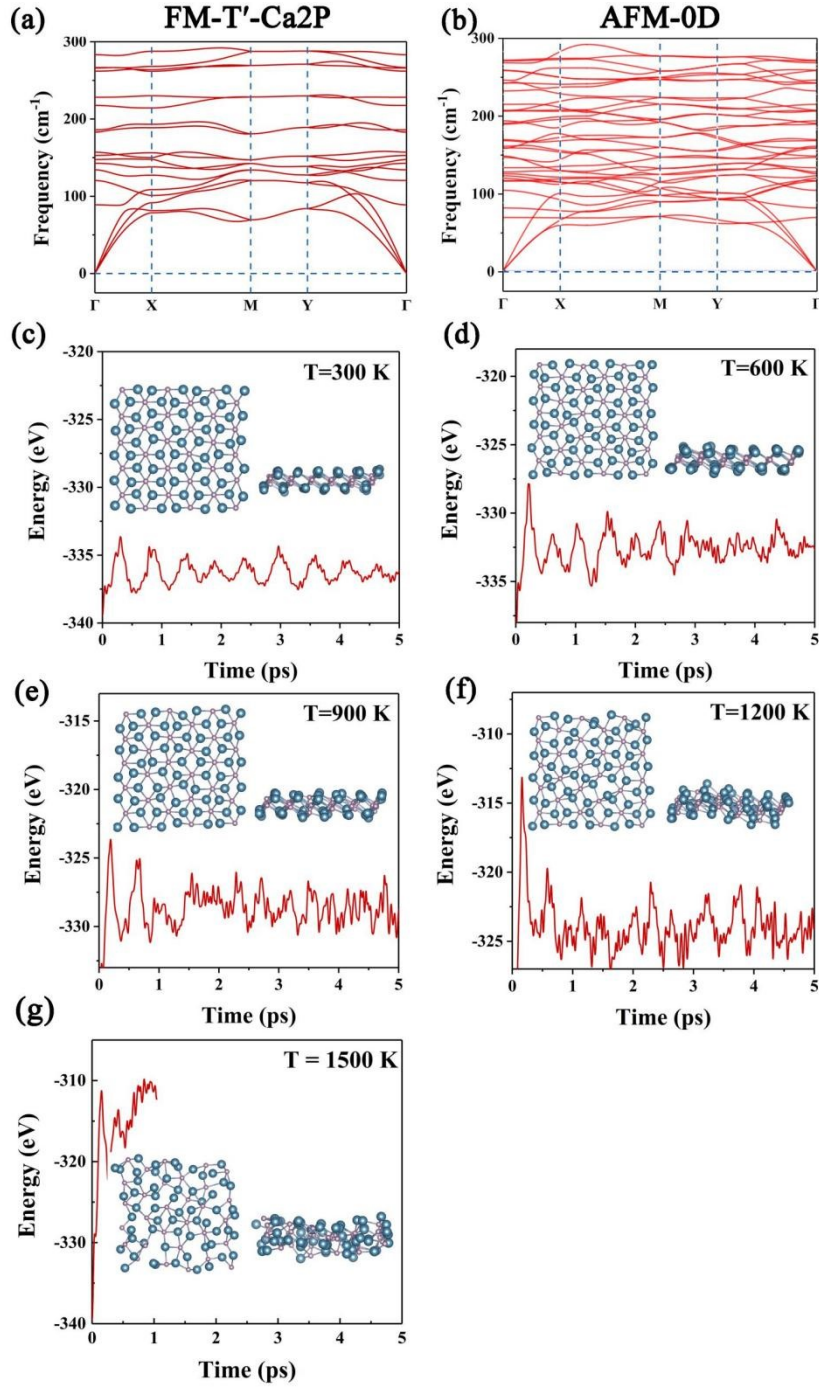

**Fig. S3** The phonon dispersion of (a) FM and (b) AFM-0D T'-Ca<sub>2</sub>P monolayer. Changes of total energy in AIMD simulations at 300 K (c), 600 K (d), 900 K (e), 1200 K (f) and 1500 K (g); inserted correspond snapshots of T'-Ca<sub>2</sub>P (3 × 5 supercell) at the end of AIMD simulations.

#### IV. Electronic properties of NM, FM and AFM of T and T' phases

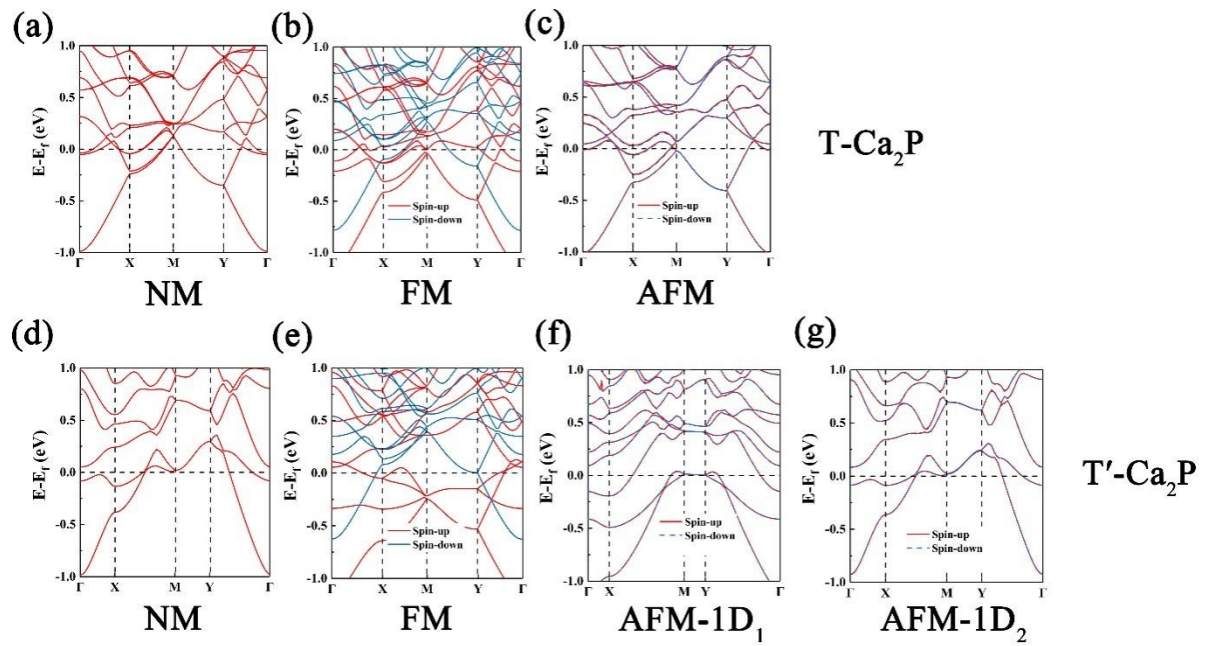

**Fig. S4** Calculated band structure of NM FM AFM states of T and T'-Ca<sub>2</sub>P.



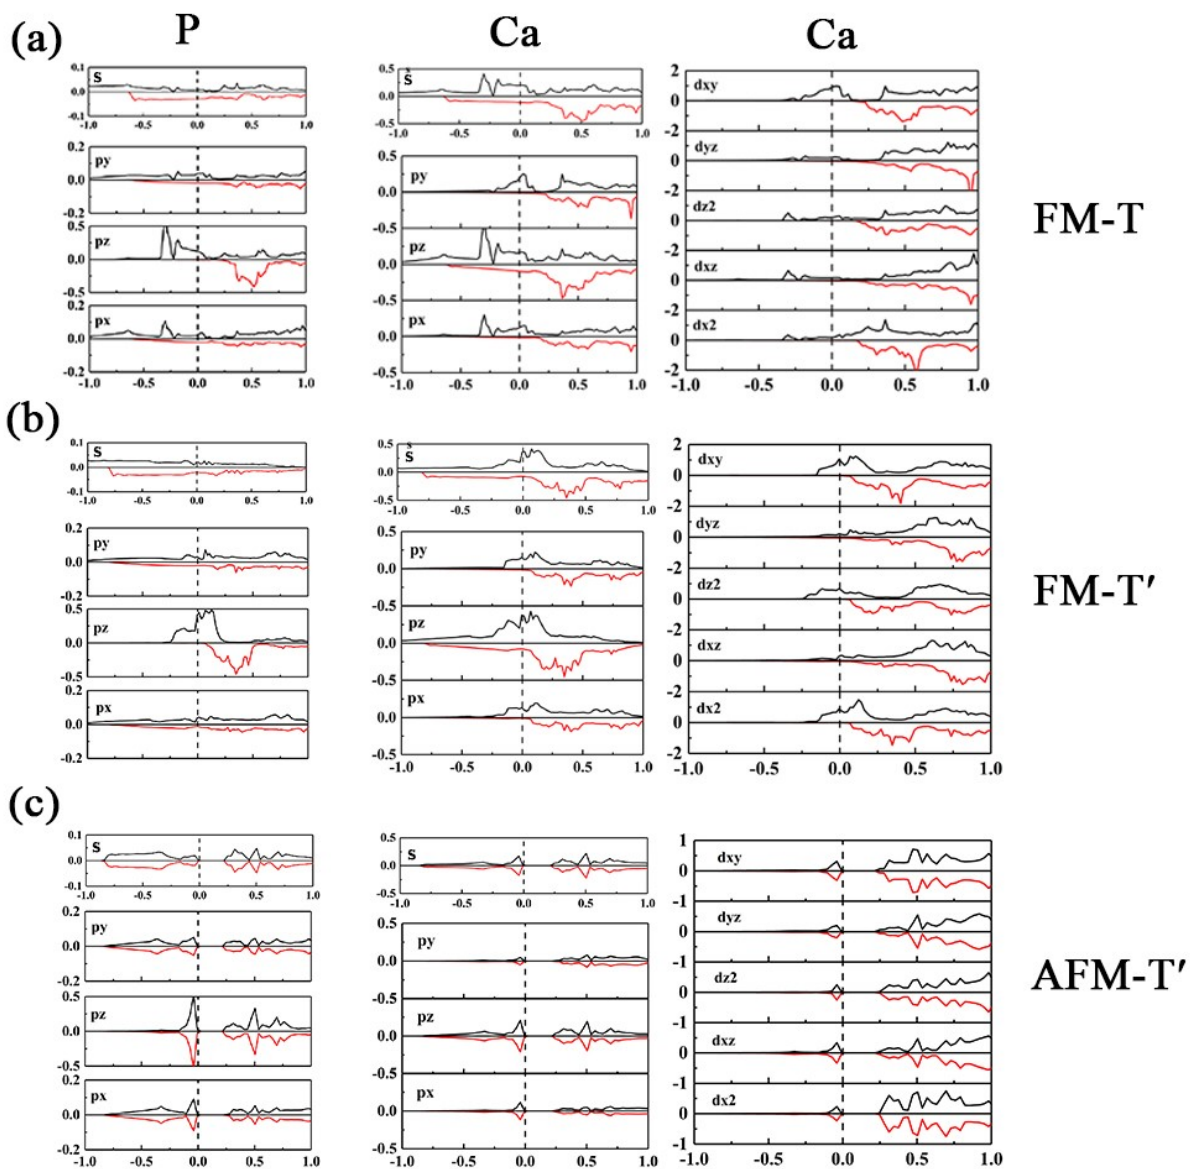

**Fig. S5** Calculated PDOS of FM and AFM states of T and T'-Ca<sub>2</sub>P.

## V. Formation and distribution of electron gas of NM, FM and AFM of T and T' phases

### Confirmation of the formation of electron gas

To investigate the origin of electron gas like behavior as displayed in ELF, three different means are applied. (1st) When one valence electron is removed from  $[\text{Ca}_2\text{P}]^+$ , the delocalized ELF features on the surfaces totally disappear, as shown in Fig. S6c†, agreed with previous criterion proposed by Yang *et al*<sup>1</sup>. Therefore, the extra electron transferred from  $\text{Ca}^{2+}_2\text{P}^{3-}$  monolayer to form the electron gas. (2nd) From the comparison of the total DOS and partial DOS (as shown in Fig. 1f) of T- $\text{Ca}_2\text{P}$  and T'- $\text{Ca}_2\text{P}$ , there is a little contribution from the atomic at fermi level, indicating that the states around  $E_f$  are mainly contributed by extra electrons. (3th) The calculated results of spin-polarization show that the magnetic moment within the default atomic radius is only 20% of the total one ( $0.26\mu_B/1.32\mu_B$ ), indicating the magnetism of T'- $\text{Ca}_2\text{P}$  is mainly contributed from the extra electron<sup>2-3</sup> on the surface of  $(\text{Ca}_2\text{P})^+$  monolayer. As the calculation shown in Fig. S2 and S6†, the appearance of ELF and spin density are quite similar. Furthermore, when the extra electron is removed, the spin density also totally disappeared, agreed with that the magnetism is mainly contributed from the extra electron. In general, the results of different means utilized here do confirm the formation of electron gas on  $\text{Ca}_2\text{P}$  system.



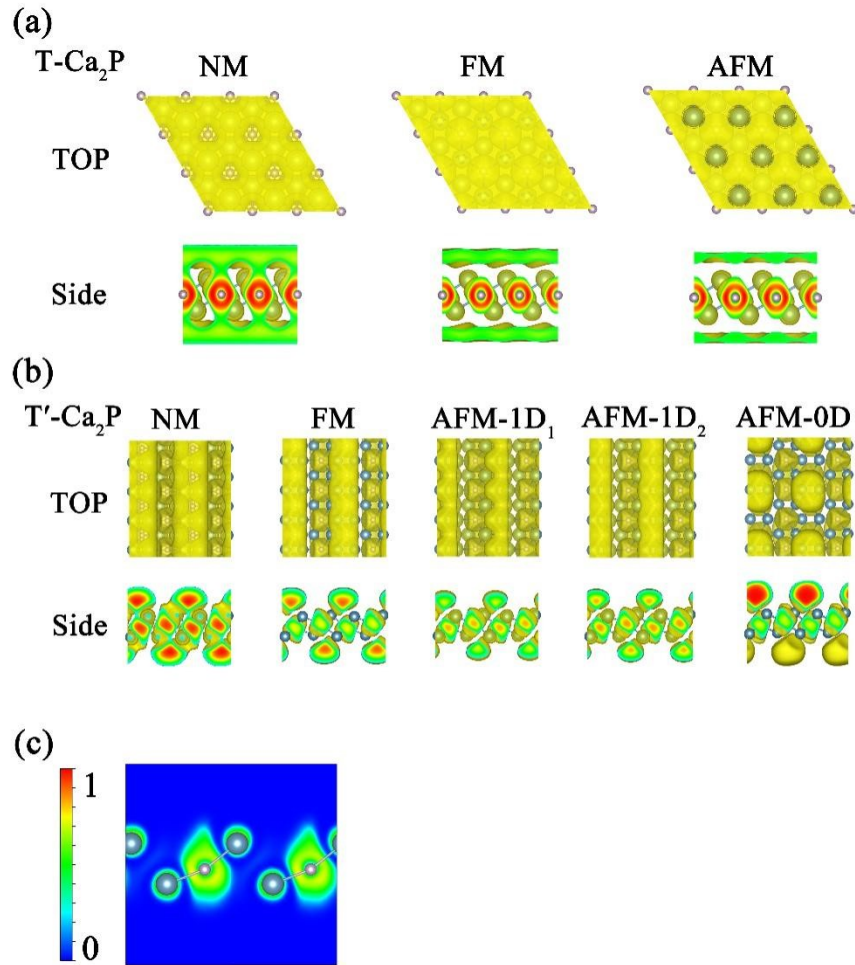

**Fig. S6** The ELFs of T-Ca<sub>2</sub>P (a) and T'-Ca<sub>2</sub>P (b) at different magnetic states, including: NM, FM and AFM T-Ca<sub>2</sub>P; NM, FM, AFM-1D<sub>1</sub>, AFM-1D<sub>2</sub> and AFM-0D T'-Ca<sub>2</sub>P. Isovalue of 0.2 e/Bohr<sup>3</sup>. (c) The ELF of [Ca<sub>2</sub>P]<sup>+</sup> with one valence electron be removed, compared to Ca<sub>2</sub>P.

## VI. Mechanical properties and interlayer interactions on the structure of T'-Ca<sub>2</sub>P.

**Equation S1.** The in-plane Young's stiffness  $Y_{2D}$  of T'-Ca<sub>2</sub>P was calculated by the equation as follows:

$$Y_{11} = \frac{C_{11}C_{22} - C_{12}^2}{C_{22}} \quad Y_{22} = \frac{C_{11}C_{22} - C_{12}^2}{C_{11}}$$

where  $C_{nm}$  are elastic constants.  $Y_{11}$  and  $Y_{22}$  are Young's stiffness along direction  $a$  and direction  $b$ , respectively.

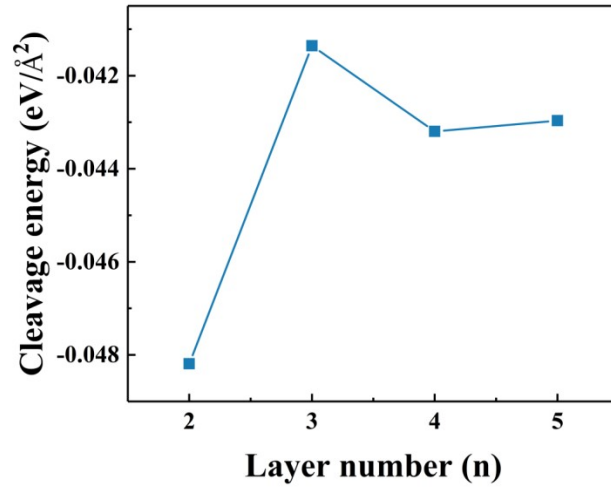

**Fig. S7** Calculated cleavage energies of the bilayer to five layers.

## VII. Single Na/K atom adsorption

**Equation S2.** Energy of single M (M= Na/K) atom adsorption was calculated by the equation below:

$$E_{Ads} = E_{M@Ca_2P} - E_{Ca_2P} - E_M$$

where  $E_{M@Ca_2P}$  is the total energy of the whole system after K<sup>+</sup> adsorption;  $E_{Ca_2P}$  is the total energy of T'-Ca<sub>2</sub>P;  $E_M$  is energy of a metal atom in bulk.

**Equation S3.** The charge density difference was estimated by the equation expressed as:

$$\Delta\rho = \rho_{M@Ca_2P} - \rho_{Ca_2P} - \rho_M$$

where  $\rho_{M@Ca_2P}$ ,  $\rho_{Ca_2P}$ ,  $\rho_M$  are the charge densities of the T'-Ca<sub>2</sub>P adsorbed metal, the pure T'-Ca<sub>2</sub>P and single metal atom, respectively.

**Table S2** Adsorption energy, bond length and charge transfer of Na and K adsorbed at T'-Ca<sub>2</sub>P.

|                      | Adsorption site | Adsorption energy<br>PBE-GGA/<br>DFT-D2<br>(eV) | Distance between<br>Na/K and nearby Ca<br>PBE-GGA/DFT-D2<br>(Å) | Charge transfer<br>form Na/K<br>PBE-GGA/<br>DFT-D2<br>(e) |
|----------------------|-----------------|-------------------------------------------------|-----------------------------------------------------------------|-----------------------------------------------------------|
| Na@Ca <sub>2</sub> P | S1              | -0.19/-0.12                                     | 3.74 ~ 3.83/<br>3.63~3.75                                       | 0.45/0.45                                                 |
|                      | S2              | -0.14/-0.09                                     | 3.71 ~ 3.90/<br>3.58~3.82                                       | 0.41/0.40                                                 |
|                      | S3              | -0.18/-0.13                                     | 3.72 ~ 3.85/<br>3.58~3.80                                       | 0.34/0.33                                                 |
| K@Ca <sub>2</sub> P  | S1              | -0.30/-0.27                                     | 4.28 ~ 4.38/<br>4.22~4.25                                       | 0.51/0.48                                                 |
|                      | S2              | -0.27/-0.21                                     | 4.56 ~ 4.07/<br>4.05~4.41                                       | 0.48/0.43                                                 |
|                      | S3              | -0.31/-0.28                                     | 4.14 ~ 4.47/<br>3.92~4.56                                       | 0.50/0.50                                                 |

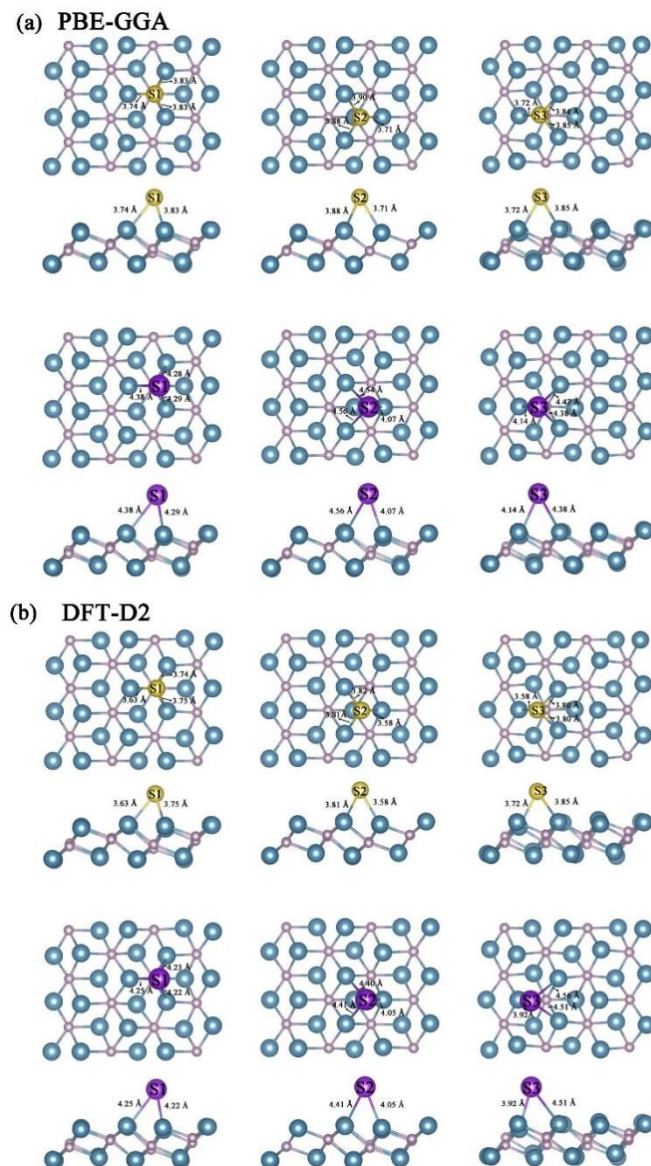

**Fig. S8** Top view and side view of Na and K at inequivalent adsorption sites, (a) PBE-GGA method, (b) DFT-D2 method.

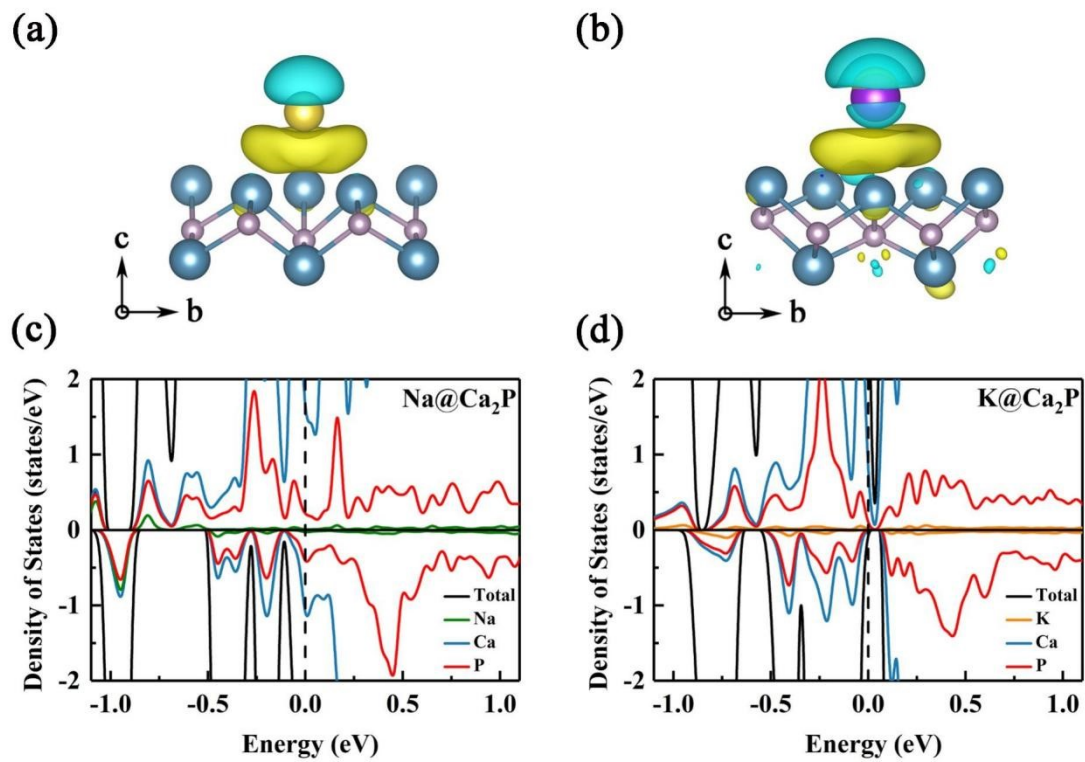

**Fig. S9** Charge density difference of Na (a) and K (b) on the favorable sites, respectively (isovalue of  $0.05 \text{ e}\text{\AA}^{-3}$ ). Total and projected DOS of Na@Ca<sub>2</sub>P (c) and K@Ca<sub>2</sub>P (d). The Fermi levels are set to zero, the black dashed line represents the Fermi level.

## VIII. Migration rates by incorporation the effects of ZPE and QMT.

The zero-points-energy correction ( $\delta E_{ZPE}$ ) to the classical barrier height can be written as<sup>4</sup>

$$\delta E_{ZPE} = \sum_i \frac{h\nu_i^{TS}}{2} - \sum_i \frac{h\nu_i^{IS}}{2}$$

where the first term is the total ZPE of the TS and the second term represent the total ZPE of initial state (IS).

The Wigner zero-point correction to the classical barrier height can be formulated as

$$\delta E_{Wig} = -k_B T \ln \left[ \frac{\prod_i \sinh\left(\frac{h\nu_i^{IS}}{2k_B T}\right)}{\prod_i \sinh\left(\frac{h\nu_i^{TS}}{2k_B T}\right)} \right]$$

where  $x_i^{IS/TS} = h\nu_i^{IS/TS}/2k_B T$ , the ratio of the ZPE to the thermal energy at each vibrational mode. If including the imaginary frequency mode of the product over saddle-point modes along the reaction coordinate in the denominator, the QMT effects on the barrier height are employed through the Wigner tunneling correction.

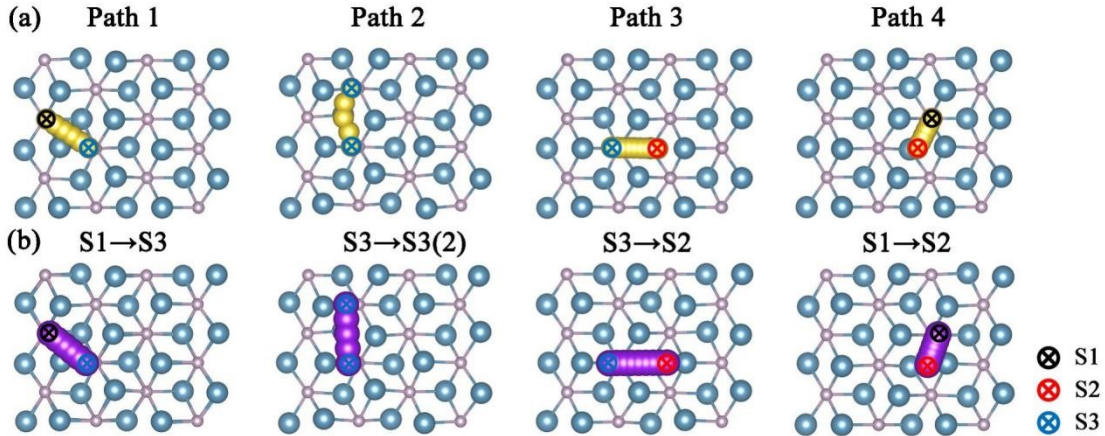

**Fig. S10** The migration paths of Na (a) and K (b) diffusion on the T'-Ca<sub>2</sub>P monolayer.

## IX. Storage capacity of T'-Ca<sub>2</sub>P.

**Equation S4.** The step adsorption energy in each stable Na/K adsorbed phase, as defined by

$$E_{step} = \frac{[E_{nM@Ca_2P} - E_{mM@Ca_2P} - (n - m)E_M]}{n - m}$$

the equation below:

where  $E_{nM@Ca_2P}$  and  $E_{mM@Ca_2P}$  represents the total energies of the T'-Ca<sub>2</sub>P with n and m metal atoms, respectively,  $E_M$  is energy of a metal atom in bulk.

**Equation S5.** The theoretical adsorption capacity of Na/K on T'-Ca<sub>2</sub>P was obtained by

following equation:

$$C_M = \frac{cxF}{M_{Ca_2P}}$$

where  $c$  is the number of valence electrons of Na/K ( $c = 1$  for Na/K),  $x$  is the number of adsorbed M atoms,  $F$  is the Faraday constant ( $26801 \text{ mAh}\cdot\text{mol}^{-1}$ ), and  $M_{Ca_2P}$  is the molar weight of the T'-Ca<sub>2</sub>P monolayer.



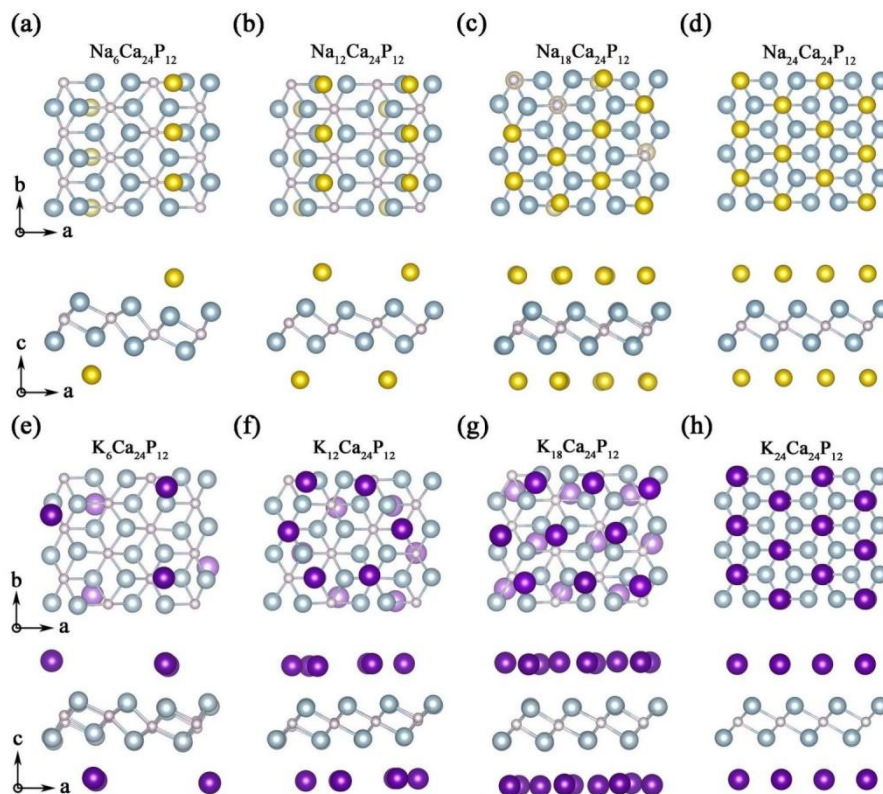

**Fig. S11** Optimized structure of  $\text{Na}_x\text{Ca}_2\text{P}$  (a-d) and  $\text{K}_x\text{Ca}_2\text{P}$  (e-h) ( $x=0.5, 1.0, 1.5$  and  $2.0$ ), respectively.

## X. Details of thermodynamic diagram calculations and Structure search by CALYPSO code.

### thermodynamic diagram

We assumed that  $M_2Ca_2P$  ( $M = Na/K$ ) can be formed during sodiation and potassiation process, while the chemical potentials of M, Ca and P required to following the thermodynamic equilibrium as:

$$2\Delta\mu_M + 2\Delta\mu_{Ca} + \Delta\mu_P = \Delta H(M_2Ca_2P) \#(1)$$

where  $\Delta H(M_2Ca_2P)$  is the formation enthalpy of  $M_xCa_2P$  ( $M = Na/K$ ). To avoid the formation of  $Ca_2P$  and  $NaP$  ( $K_2P_3$ ) phases as well as the formation of M, Ca and P crystals, the chemical potentials also satisfy the following constraints:

$$\Delta\mu_{Na} + \Delta\mu_P \leq \Delta H(NaP) \#(2)$$

$$2\Delta\mu_K + 3\Delta\mu_P \leq \Delta H(K_2P_3) \#(3)$$

$$2\Delta\mu_{Ca} + \Delta\mu_P \leq \Delta H(Ca_2P) \#(4)$$

$$\Delta\mu_M \leq 0, \Delta\mu_{Ca} \leq 0, \Delta\mu_P \leq 0 \#(5)$$

where  $\Delta H(NaP)$  and  $\Delta H(K_2P_3)$  are the formation enthalpy of NaP and  $K_2P_3$ , respectively. The computed formation entropies of  $Na_2Ca_2P$ ,  $K_2Ca_2P$ ,  $Ca_2P$ , NaP and  $K_2P_3$  are -2.319, -2.243, -1.944, -0.788 and -2.204 eV, respectively. Using Eq. (1)-(5), the thermodynamic phase diagrams<sup>5-6</sup> of sodiated and potassiated T'- $Ca_2P$  can be obtained.

### Structure search by CALYPSO code

The particle-swarm optimization (PSO) scheme, as implemented in the CALYPSO code<sup>7</sup>, is employed to search for low energy 2D  $M_2Ca_2P$  ( $M = Na/K$ ), which has been successfully and widely applied in global structure search for new materials. In our PSO calculations, the population size and the number of generations are set as 30 and 20 (600 different structures), respectively.

The global minimum and the other metastable isomers are shown in Fig. S11. Based on the rank of the structures in order of enthalpy, the global minimum structures for both  $Na_2Ca_2P$  and  $K_2Ca_2P$  are expected phases in our work, that Na or K evenly distributed on both sides of  $Ca_2P$  characterized by 2D “sandwich” structures. These results indicate, for the Na/K- $Ca_2P$  systems, Na and K atoms tend to be adsorbed on the surface of  $Ca_2P$  monolayer rather than to destroy the  $Ca_2P$  monolayer to form other ternary compounds.

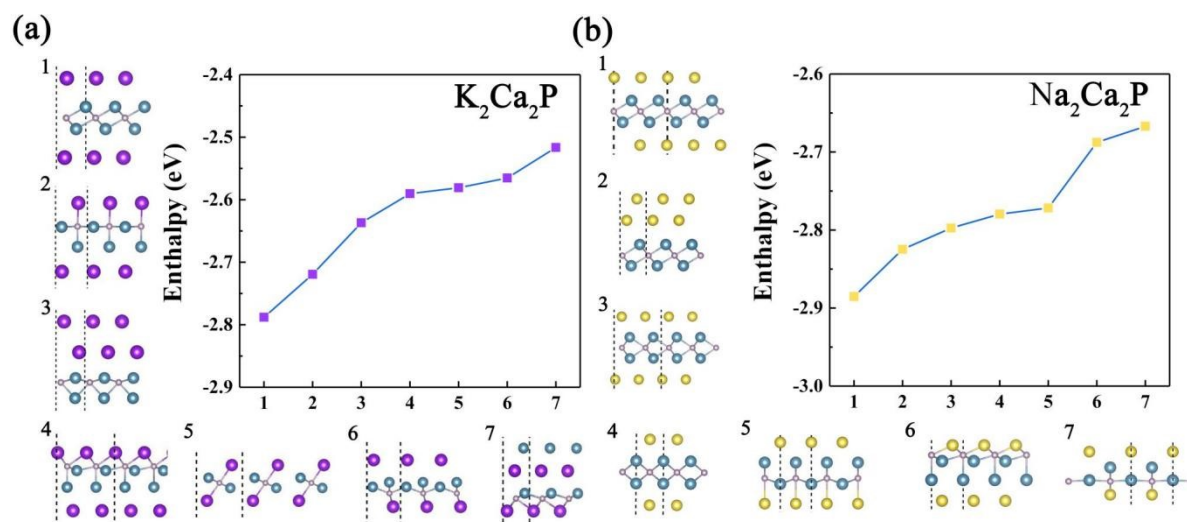

**Fig. S12** Isomers of 2D  $K_2Ca_2P$  (a) and  $Na_2Ca_2P$  (b) found by the Calypso structure search, where insets are the enthalpy of the corresponding structure. The Na, K, Ca and Mg are denoted by yellow, purple, blue and pink spheres, respectively.

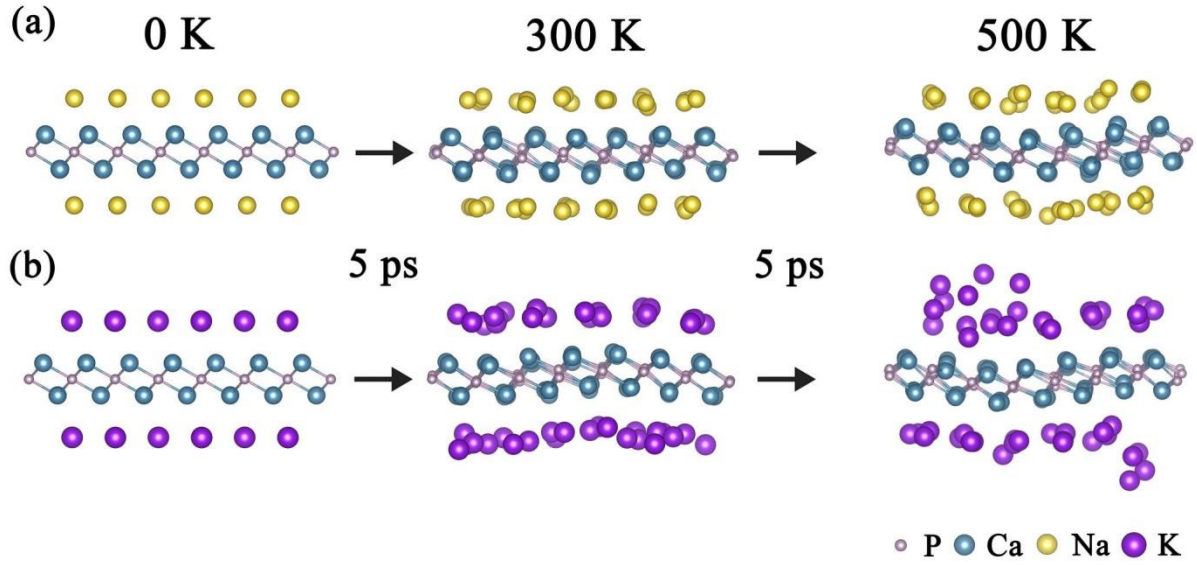

**Fig. S13** Snapshots of the structures of (a)  $\text{Na}_2\text{Ca}_2\text{P}$ , (b)  $\text{K}_2\text{Ca}_2\text{P}$  before and after 5 ps AIMD simulation at 300 K and 500 K, respectively.

## XI. Details for formation energy and VOC calculations.

**Equation S6.** The formation energy of  $\text{M}_x\text{Ca}_2\text{P}$  at different adsorption content was calculated by the equation:

$$E_f = (E_{\text{M}_x\text{Ca}_2\text{P}} - E_{\text{Ca}_2\text{P}} - xE_M) / (x + 1)$$

where  $E_{\text{M}_x\text{Ca}_2\text{P}}$  is the total energy of T'- $\text{Ca}_2\text{P}$  with  $x$  adsorption number of metal atoms,  $E_M$  is energy of a metal atom in bulk.

**Equation S7.** The average open circuit voltage was calculated by the equation:

$$V_{\text{Ave}} = - \frac{[E_{n\text{M}@Ca_2P} - E_{m\text{M}@Ca_2P} - (n - m)E_M]}{(n - m) * e}$$

where  $\text{M}_x\text{Ca}_2\text{P}$  ( $x = n/m$ ) are the adjacent thermodynamically stable structure with different Na/K ion concentration.

## XII. Structural information of $M_x\text{Ca}_2\text{P}$ and ELF's of $\text{Na}_2\text{Ca}_2\text{P}$ and $\text{K}_2\text{Ca}_2\text{P}$

**Table S3** The structure and energies information of  $M_x\text{Ca}_2\text{P}$  ( $M = \text{Na}/\text{K}$   $x = 0.5$   $1.0$   $1.5$   $2.0$ ), respectively.

| structure                            | $E_{\text{step}}$ (eV)<br>PBE-<br>GGA/<br>DFT-D2 | $E_f$ (eV)<br>PBE-<br>GGA/<br>DFT-D2 | L (Å)                   |                         | Percentage change (%)       |                             |
|--------------------------------------|--------------------------------------------------|--------------------------------------|-------------------------|-------------------------|-----------------------------|-----------------------------|
|                                      |                                                  |                                      | a<br>PBE-GGA/<br>DFT-D2 | b<br>PBE-GGA/<br>DFT-D2 | a<br>PBE-<br>GGA/<br>DFT-D2 | b<br>PBE-<br>GGA/<br>DFT-D2 |
| T'- $\text{Ca}_2\text{P}$            | -                                                | 0                                    | 14.76/14.70             | 12.70/12.62             | -                           | -                           |
| $\text{Na}_{0.5}\text{Ca}_2\text{P}$ | -0.22/-0.24                                      | -0.08/-0.07                          | 14.46/14.33             | 12.73/12.67             | -2.03/-2.48                 | 0.24/0.38                   |
| $\text{Na}_1\text{Ca}_2\text{P}$     | -0.08/-0.04                                      | -0.07/-0.07                          | 14.73/14.67             | 12.68/12.56             | -0.20/-0.20                 | -0.16/-0.44                 |
| $\text{Na}_{1.5}\text{Ca}_2\text{P}$ | -0.15/-0.18                                      | -0.09/-0.09                          | 14.55/14.41             | 12.62/12.52             | -1.42/-1.97                 | -0.63/-0.76                 |
| $\text{Na}_2\text{Ca}_2\text{P}$     | -0.28/-0.31                                      | -0.13/-0.12                          | 14.53/14.35             | 12.57/12.45             | -1.56/-2.38                 | -1.02/-1.29                 |

  

| structure                           | $E_{\text{step}}$ (eV)<br>PBE-GGA/<br>DFT-D2 | $E_f$ (eV)<br>PBE-<br>GGA/<br>DFT-D2 | L (Å)                   |                         | Percentage change (%)       |                             |
|-------------------------------------|----------------------------------------------|--------------------------------------|-------------------------|-------------------------|-----------------------------|-----------------------------|
|                                     |                                              |                                      | a<br>PBE-GGA/<br>DFT-D2 | b<br>PBE-GGA/<br>DFT-D2 | a<br>PBE-<br>GGA/<br>DFT-D2 | b<br>PBE-<br>GGA/<br>DFT-D2 |
| T'- $\text{Ca}_2\text{P}$           | -                                            | 0                                    | 14.76/14.70             | 12.70/12.62             | -                           | -                           |
| $\text{K}_{0.5}\text{Ca}_2\text{P}$ | -0.27/-0.27                                  | -0.09/-0.09                          | 14.56/14.46             | 12.65/12.57             | -1.36/-1.65                 | -0.39/-0.41                 |
| $\text{K}_1\text{Ca}_2\text{P}$     | -0.14/-0.15                                  | -0.10/-0.10                          | 14.56/14.46             | 12.68/12.58             | -1.36/-1.63                 | -0.16/-0.28                 |
| $\text{K}_{1.5}\text{Ca}_2\text{P}$ | -0.20/-0.22                                  | -0.12/-0.13                          | 14.52/14.43             | 12.69/12.57             | -1.63/-1.80                 | -0.08/-0.36                 |
| $\text{K}_2\text{Ca}_2\text{P}$     | -0.01/-0.09                                  | -0.10/-0.12                          | 15.04/14.93             | 13.00/12.93             | 1.90/1.60                   | 2.36/2.45                   |

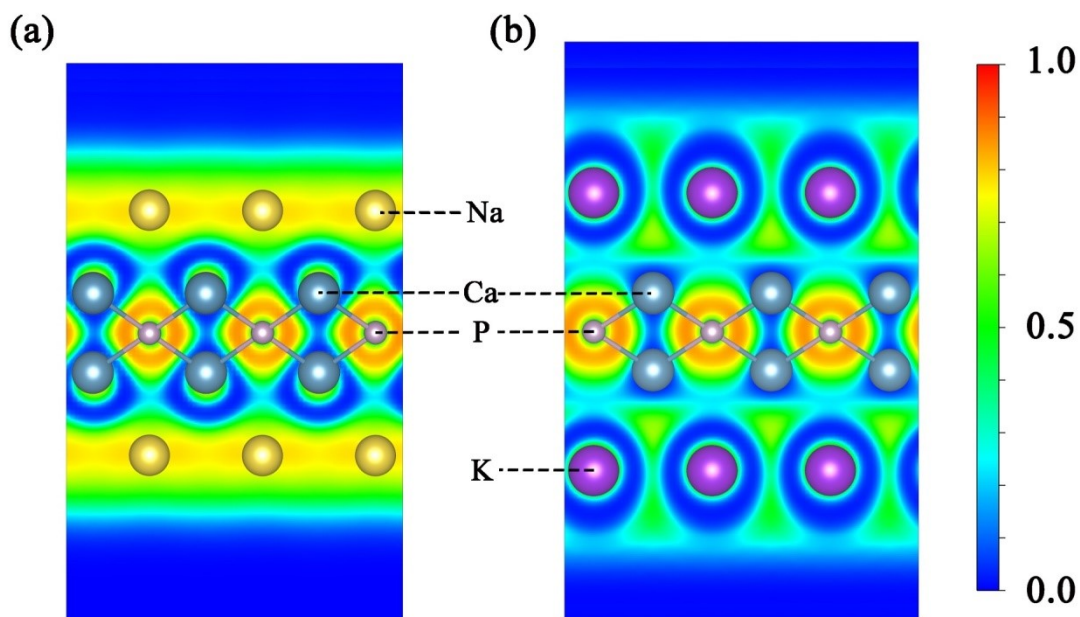

**Fig. S14** ELFs of one layer of Na atoms (a) and K atoms (b). The higher value represents the higher electrons localization.

## References

- 1 S. Zhao, Z. Li and J. Yang, *J. Am. Chem. Soc.*, 2014, **136**, 13313-13318.
- 2 X. Sui, J. Wang, C. Yam and B. Huang, *Nano Lett.*, 2021, **21**, 3813–3819.
- 3 W. Li, H. Hu and J. Choi, *Phys. Rev. B*, 2021, **103**, 195421.
- 4 S. Karmakar, C. Chowdhury and A. Datta, *J. Phys. Chem. C*, 2016, **120**, 14522–14530.
- 5 T. Zhao, H. Shu, Z. Shen, H. Hu, J. Wang and X. Chen, *J. Phys. Chem. C*, 2019, **123**, 2139-2146.
- 6 H. Shu, F. Li, C. Hu, P. Liang, D. Cao and X. Chen, *Nanoscale*, 2016, **8**, 2918-2926.
- 7 Y. Wang, J. Lv, L. Zhu, S. Lu, K. Yin and Q. Li, *J. Phys.: Condens. Matter*, 2015, **27**, 203203.
